# Supplementary material for: Synthesis, Characterisation, and In Vitro Evaluation of Biocompatibility, Antibacterial and Antitumor Activity of Imidazolium Ionic Liquids
Source: MDPI journal article supplement (doi:10.3390/pharmaceutics16050642), 2024-05-10
Supplement: s1 [file s1]

## Synthesis, Characterisation, and In Vitro Evaluation of Biocompatibility, Antibacterial and Antitumor Activity of Imidazolium Ionic Liquids

Elisabetta Novello <sup>1,†</sup>, Giuseppina Scalzo <sup>1,†</sup>, Giovanni D'Agata <sup>1</sup>, Maria G. Raucci <sup>2,\*</sup>, Luigi Ambrosio <sup>2</sup>, Alessandra Soriente <sup>2</sup>, Barbara Tomasello <sup>3</sup>, Cristina Restuccia <sup>4</sup>, Lucia Parafati <sup>4</sup>, Grazia M. L. Consoli <sup>5</sup>, Loredana Ferreri <sup>5</sup>, Antonio Rescifina <sup>3</sup>, Chiara Zagni <sup>3,\*</sup> and Daniela C. Zampino <sup>1</sup>

<sup>1</sup> *Institute of Polymers, Composites and Biomaterials (IPCB)—CNR, Section of Catania, Via Paolo Gaifami, 18, 95126 Catania, Italy*

<sup>2</sup> *Institute of Polymers, Composites and Biomaterials (IPCB)—CNR, Section of Napoli, Viale J.F. Kennedy n.54, Pad.20, 80125 Napoli, Italy*

<sup>3</sup> *Department of Drug and Health Sciences, University of Catania, Viale A. Doria 6, 95125 Catania, Italy*

<sup>4</sup> *Department of Agriculture, Food and Environment, University of Catania, Via Santa Sofia 100, 95123 Catania, Italy*

<sup>5</sup> *Institute of Biomolecular Chemistry (ICB)-CNR, via Paolo Gaifami 18, 95126 Catania, Italy*

\* Corresponding authors:

Maria G. Raucci, E-mail Address: [mariagrazia.raucci@cnr.it](mailto:mariagrazia.raucci@cnr.it)

Chiara Zagni, E-mail Address: [chiara.zagni@unict.it](mailto:chiara.zagni@unict.it)

† These authors have contributed equally to the research

## IL synthesis

The ILs were synthesized using a two-step method involving the alkylation of the imidazolium ring and metathesis reactions, slightly modifying previously reported synthetic procedures [1-3].

The IL series containing the Br anion (C9mimBr, C10mimBr, C12mimBr, C14mimBr, C16mimBr, C18mimBr, C20mimBr) was synthesized by reacting equimolar amounts of 1-methylimidazole with alkyl bromides containing C9, C10, C12, C14, C16, C18 and C20 hydrocarbon chains, respectively. The reactions were performed at 60 °C for 24 h under a nitrogen atmosphere and vigorous stirring. The obtained products were washed with ethyl acetate and dried in a vacuum oven for 24–48 h.

The ionic exchange between the synthesized 1-alkyl-3-methylimidazolium bromides and the sodium salts of tetrafluoroborate (BF<sub>4</sub>) and 1,3-dimethyl-5-sulfoisophthalate (DMSIP) was made by stirring the solutions containing the alkyl-methylimidazolium bromides (0.020 mol) in DCM and the chosen salts (0.021 mol) in water at room temperature (RT) for 1 h. Then, the obtained solutions were transferred together into a separating funnel and stirred vigorously. When both phases became clear, well separated and without precipitates, the organic layer was taken, dried over anhydrous sodium sulphate and filtrated. The resulting viscous-liquid ILs (C9mimBF<sub>4</sub>, C9mimDMSIP, C10mimBF<sub>4</sub>, C10mimDMSIP) were dried at 25–30 °C for 48 h, whereas the powders of the other ILs were dried in a vacuum drying oven for 48 h at 40–45 °C. The complete exchange of the bromide counter-ion was verified by the silver nitrate test. If the exchange was not completed, a new water solution containing the same sodium salt was added to the organic phase to obtain a complete exchange.

## Synthesis of the C<sub>n</sub>mimBF<sub>4</sub> series

### 1-nonyl-3-methylimidazolium tetrafluoroborate (C9mimBF<sub>4</sub>)

1-nonyl-3-methylimidazolium bromide (0.020 mol, 5.78 g) was dissolved in 50 mL of DCM and added to 50 mL water solution of sodium tetrafluoroborate (0.022 mol, 2.41 g) in a separating funnel. The reaction proceeds according to the metathesis procedure. A yellow viscous oil was obtained. Yield 70%.

### 1-decyl-3-methylimidazolium tetrafluoroborate (C10mimBF<sub>4</sub>)

1-decyl-3-methylimidazolium bromide (20 mmol, 6.04 g) was dissolved in 50 mL of DCM and added to 50 mL water solution of sodium tetrafluoroborate (22 mmol, 2.41 g) in a separating funnel. The reaction proceeds according to the metathesis procedure. A yellow viscous oil was obtained. Yield 72%.

**1-dodecyl-3-methylimidazolium tetrafluoroborate (C12mimBF<sub>4</sub>)**

1-dodecyl-3-methylimidazolium bromide (20 mmol, 6.60 g) was dissolved in 50 mL of DCM and added to 50 mL water solution of sodium tetrafluoroborate (22 mmol, 2.41 g) in a separating funnel. The reaction proceeds according to the metathesis procedure. A white solid was obtained. Yield 82%.

**1-tetradecyl-3-methylimidazolium tetrafluoroborate (C14mimBF<sub>4</sub>)**

1-tetradecyl-3-methylimidazolium bromide (20 mmol, 7.16 g) was dissolved in 50 mL of dichloromethane (DCM) and added to a solution of sodium tetrafluoroborate salt (22 mmol, 2.41 g) dissolved in 50 mL of water in a separating funnel. The reaction proceeds according to the procedure used for metathesis 2. A white solid was obtained. Yield 88%.

**1-hexadecyl-3-methylimidazolium tetrafluoroborate (C16mimBF<sub>4</sub>)**

1-hexadecyl-3-methyl-imidazolium bromide (20 mmol, 7.74 g) was dissolved in 50 mL of DCM and added to a solution of sodium tetrafluoroborate (22 mmol, 2.41 g) dissolved in 50 mL of water in a separating funnel. The reaction proceeds according to the procedure used for metathesis 2. A white solid was obtained. Yield 80%.

**1-octadecyl-3-methylimidazolium tetrafluoroborate (C18mimBF<sub>4</sub>)**

1-octadecyl-3-methylimidazolium bromide (20 mmol, 8.30 g) was dissolved in 50 mL of DCM and added to a solution of sodium tetrafluoroborate (22 mmol, 2.41 g) dissolved in 50 mL of water in a separating funnel. The reaction proceeds according to the procedure used for metathesis 2. A light-yellow solid was obtained. Yield 85%.

**1-eicosyl-3-methylimidazolium tetrafluoroborate (C20mimBF<sub>4</sub>)**

1-eicosyl-3-methylimidazolium bromide (20 mmol, 8.87 g) was dissolved in 50 mL of DCM and added to a solution of sodium tetrafluoroborate (22 mmol, 2.41 g) dissolved in 50 mL of water in a separating funnel. The reaction proceeds according to the procedure used for metathesis 2. A pale-yellow solid was obtained. Yield 84%.

## Synthesis of the *C<sub>n</sub>mim*DMSIP series

### **1-nonyl-3-methylimidazolium 1,3-dimethyl-5-sulfoisophthalate (C9mimDMSIP)**

1-nonyl-3-methylimidazolium bromide (0.020 mol, 5.78 g) was dissolved in 50 mL of DCM and added to 50 mL water solution of sodium tetrafluoroborate (0.022 mol, 6.51 g) in a separating funnel. The reaction proceeds according to the metathesis procedure. A yellow viscous oil was obtained. Yield 73%.

### **1-decyl-3-methylimidazolium 1,3-dimethyl-5-sulfoisophthalate (C10mimDMSIP)**

1-decyl-3-methylimidazolium bromide (20 mmol, 6.04 g) was dissolved in 50 mL of DCM and added to 50 mL water solution of sodium tetrafluoroborate (22 mmol, 6.51 g) in a separating funnel. The reaction proceeds according to the metathesis procedure. A yellow viscous oil was obtained. Yield 75%.

### **1-dodecyl-3-methylimidazolium 1,3-dimethyl-5-sulfoisophthalate (C12mimDMSIP)**

1-dodecyl-3-methylimidazolium bromide (20 mmol, 6.60 g) was dissolved in 50 mL of DCM and added to 50 mL water solution of sodium tetrafluoroborate (22 mmol, 6.51 g) in a separating funnel. The reaction proceeds according to the metathesis procedure. A white solid was obtained. Yield 80%.

### **1-tetradecyl-3-methylimidazolium 1,3-dimethyl-5-sulfoisophthalate (C14mimDMSIP)**

1-tetradecyl-3-methylimidazolium bromide (20 mmol, 7.16 g) was dissolved in 50 mL of DCM and added to a solution of sodium dimethyl-5-sulfoisophthalate (22 mmol, 6.51 g) dissolved in 50 mL of water in a separating funnel. The reaction proceeds according to the procedure used for metathesis 2. A white solid was obtained. Yield 85%.

### **1-hexadecyl-3-methylimidazolium 1,3-dimethyl-5-sulfoisophthalate (C16mimDMSIP)**

1-hexadecyl-3-methylimidazolium bromide (20 mmol, 7.74 g) was dissolved in 50 mL of DCM and added to a solution of sodium dimethyl-5-sulfoisophthalate (22 mmol, 6.51 g) dissolved in 50 mL of water in a separating funnel. The reaction proceeds according to the procedure used for metathesis 2. A white solid was obtained. Yield 93%.

### **1-octadecyl-3-methylimidazolium 1,3-dimethyl-5-sulfoisophthalate (C18mimDMSIP)**

1-octadecyl-3-methylimidazolium bromide (20 mmol, 8.30 g) was dissolved in 50 mL of DCM and added to a solution of sodium dimethyl-5-sulfoisophthalate (22 mmol, 6.51 g) dissolved in 50 mL of

water in a separating funnel. The reaction proceeds according to the procedure used for metathesis 2. A light-yellow solid was obtained. Yield 82%.

### **1-eicosyl-3-methylimidazolium 1,3-dimethyl-5-sulfoisophthalate (C20mimDMSIP)**

1-eicosyl-3-methylimidazolium bromide (20 mmol, 8.87 g) was dissolved in 50 mL of DCM and added to a solution of sodium dimethyl-5-sulfoisophthalate (22 mmol, 6.51 g) dissolved in 50 mL of water in a separating funnel. The reaction proceeds according to the procedure used for metathesis 2. A pale-yellow solid was obtained. Yield 82%.

### **Characterisation of pure ILs, neat PVC and PVC/IL films**

**Table S1.** Molecular weight, color, physical state,  $T_m$  and  $^1\text{H}$ -NMR spectral data of the ILs synthesized.

**Table S2.** Formulas, calculated and measured  $m/z$  values of the peaks assigned to cations and adducts of ILs by MALDI TOF analysis.

**Table S3.** ILs release (%) from the PVC blends loaded with the PVC/ $C_n\text{mimBF}_4$  and PVC/ $C_n\text{mimDMSIP}$  blends, at different concentrations (0.5, 1, 5%).

**Figure S1.**  $^1\text{H}$ -NMR spectrum (400 MHz,  $\text{DMSO-d}_6$ ,  $\delta$  ppm) of the IL 1-dodecyl-3-methylimidazolium tetrafluoroborate ( $\text{C}_{12}\text{mimBF}_4$ ).

**Figure S2.**  $^1\text{H}$ -NMR spectrum (400 MHz,  $\text{DMSO-d}_6$ ,  $\delta$  ppm) of the IL 1-dodecyl-3-methylimidazolium 1,3-dimethyl-5-sulfoisophthalate ( $\text{C}_{12}\text{mimDMSIP}$ ).

**Figure S3.** Images of neat PVC and PVC blend films loaded with 5 wt% concentration of  $\text{C}_{12}\text{mimDMSIP}$  (A);  $\text{C}_{14}\text{mimDMSIP}$  (B),  $\text{C}_{16}\text{mimDMSIP}$  (C) and  $\text{C}_{12}\text{mimBF}_4$  (D),  $\text{C}_{14}\text{mimBF}_4$  (E),  $\text{C}_{16}\text{mimBF}_4$  (F).

**Figure S4.** DSC curves of neat PVC TOTM.

**Figure S5.** DSC curves of neat PVC TOTM and PVC/ $C_n\text{mimBF}_4$  blend films ( $n=12, 14, 16$ ).

**Figure S6.** DSC curves of neat PVC and PVC/ $C_n\text{mimDMSIP}$  blend films ( $n=12, 14, 16$ ).

**Figure S7.** SEM picture (magnification 2000x) of neat PVC

**Figure S8.** SEM pictures (magnification 1000x) of PVC blend films containing the 0.5 wt% of (A)  $\text{C}_{12}\text{mimBF}_4$ , (B)  $\text{C}_{14}\text{mimBF}_4$ , (C)  $\text{C}_{16}\text{mimBF}_4$ , (D)  $\text{C}_{12}\text{mimDMSIP}$ , (E)  $\text{C}_{14}\text{mimDMSIP}$ , (F)  $\text{C}_{16}\text{mimDMSIP}$ .

**Table S1.** Molecular weight, colour and physical state and  $T_m$  of the ILs synthesized, together with their  $^1\text{H}$ -NMR spectral data. The chemical shift of the  $C_n\text{mimBF}_4$  series and the IL  $C_{16}\text{mimDMSIP}$ , obtained by using deuterated acetone,  $\text{CDCl}_3/\text{TFA}$  and  $\text{CDCl}_3$ , were previously reported in the literature [1-3].

| ILs                     | Mw<br>g/mol | Colour/State<br>Yield        | $T_m$<br>(°C) | $^1\text{H}$ -NMR Chemical Shift (400 MHz,<br>DMSO- $d_6$ , $\delta$ ppm)                                                                                                                                                                                                                                                                                                                                                                                                                                                                                                                                     |
|-------------------------|-------------|------------------------------|---------------|---------------------------------------------------------------------------------------------------------------------------------------------------------------------------------------------------------------------------------------------------------------------------------------------------------------------------------------------------------------------------------------------------------------------------------------------------------------------------------------------------------------------------------------------------------------------------------------------------------------|
| $C_9\text{mimBF}_4$     | 296.16      | Yellow/viscous<br>oil<br>70% | -             | 0.86 (t, 3H, $\text{CH}_3\text{-C}_8$ ), 1.25 (m, 12 H, $\text{CH}_2$ ), 1.77 (m, 2H, $\text{CH}_2\text{-CH}_2\text{-N}$ ) 3.84 (s, 3H, $\text{CH}_3\text{-N}$ ) 4.15 (t, 2H, $\text{CH}_2\text{-N}$ ), 7.70 (s, 1H, CH in imidazolium ring), 7.77 (s, 1H, CH in imidazolium ring), 9.09 (s, 1H, CH in imidazolium ring).                                                                                                                                                                                                                                                                                     |
| $C_9\text{mimDMSIP}$    | 482.59      | Yellow/viscous<br>oil<br>73% | -             | 0.85 (t, 3H, $\text{CH}_3\text{-C}_8$ ), 1.23 (m, 12 H, $\text{CH}_2$ ), 1.76 (m, 2H, $\text{CH}_2\text{-CH}_2\text{-N}$ ) 3.84 (s, 3H, $\text{CH}_3\text{-N}$ ) 4.14 (t, 2H, $\text{CH}_2\text{-N}$ ), 7.69 (s, 1H, CH in imidazolium ring), 7.76 (s, 1H, CH in imidazolium ring), 9.09 (s, 1H, CH in imidazolium ring).<br>Signals of the benzene ring in 1,3-dimethyl - 5-sulfoisophthalate anion: 3.90 (s, 6H, $\text{CH}_3\text{-O}$ ), 8.39 (d, 2H, CH in ortho position with respect to $\text{SO}_3^-$ substituents), 8.42 (d, 1H, CH in para position with respect to $\text{SO}_3^-$ substituents). |
| $C_{10}\text{mimBF}_4$  | 310.18      | Yellow/viscous<br>oil<br>72% | --            | 0.85 (t, 3H, $\text{CH}_3\text{-C}_9$ ), 1.24 (m, 14 H, $\text{CH}_2$ ), 1.77 (m, 2H, $\text{CH}_2\text{-CH}_2\text{-N}$ ) 3.84 (s, 3H, $\text{CH}_3\text{-N}$ ) 4.14 (t, 2H, $\text{CH}_2\text{-N}$ ), 7.69 (s, 1H, CH in imidazolium ring), 7.76 (s, 1H, CH in imidazolium ring), 9.09 (s, 1H).                                                                                                                                                                                                                                                                                                             |
| $C_{10}\text{mimDMSIP}$ | 496.62      | Yellow/viscous<br>oil<br>75% | -             | Signals of the benzene ring in dimethyl-5-sulfoisophthalate anion: 3.91 (s, 6H, $\text{CH}_3\text{-O}$ ), 8.39 (d, 2H, CH in ortho position with respect                                                                                                                                                                                                                                                                                                                                                                                                                                                      |

|                                |        |                    |    |                                                                                                                                                                                                                                                                                                                                                                                                                                                                                                                                                                                                                |
|--------------------------------|--------|--------------------|----|----------------------------------------------------------------------------------------------------------------------------------------------------------------------------------------------------------------------------------------------------------------------------------------------------------------------------------------------------------------------------------------------------------------------------------------------------------------------------------------------------------------------------------------------------------------------------------------------------------------|
|                                |        |                    |    | to $\text{SO}_3^-$ substituents), 8.42 (d, 1H, CH in para position with respect to $\text{SO}_3^-$ substituents). Signals of the benzene ring in 1,3-dimethyl-5-sulfoisophthalate anion: 3.91 (s, 6H, $\text{CH}_3\text{-O}$ ), 8.39 (d, 2H, CH in ortho position with respect to $\text{SO}_3^-$ substituents), 8.42 (d, 1H, CH in para position with respect to $\text{SO}_3^-$ substituents).                                                                                                                                                                                                               |
| $\text{C}_{12}\text{mimBF}_4$  | 338.24 | White solid<br>82% | 31 | 0.86 (t, 3H, $\text{CH}_3\text{-C}_{11}$ ), 1.24 (m, 18 H, $\text{CH}_2$ ), 1.77 (m, 2H, $\text{CH}_2\text{-CH}_2\text{-N}$ ) 3.84 (s, 3H, $\text{CH}_3\text{-N}$ ) 4.14 (t, 2H, $\text{CH}_2\text{-N}$ ), 7.70 (s, 1H, CH in imidazolium ring), 7.77 (s, 1H, CH in imidazolium ring), 9.10 (s, 1H, CH in imidazolium ring).                                                                                                                                                                                                                                                                                   |
| $\text{C}_{12}\text{mimDMSIP}$ | 524.67 | White solid<br>80% | -  | 0.84 (t, 3H, $\text{CH}_3\text{-C}_{11}$ ), 1.22 (m, 18 H, $\text{CH}_2$ ), 1.75 (m, 2H, $\text{CH}_2\text{-CH}_2\text{-N}$ ) 3.83 (s, 3H, $\text{CH}_3\text{-N}$ ) 4.13 (t, 2H, $\text{CH}_2\text{-N}$ ), 7.69 (s, 1H, CH in imidazolium ring), 7.76 (s, 1H, CH in imidazolium ring), 9.10 (s, 1H, CH in imidazolium ring).<br>Signals of the benzene ring in 1,3-dimethyl-5-sulfoisophthalate anion: 3.90 (s, 6H, $\text{CH}_3\text{-O}$ ), 8.38 (d, 2H, CH in ortho position with respect to $\text{SO}_3^-$ substituents), 8.42 (d, 1H, CH in para position with respect to $\text{SO}_3^-$ substituents). |
| $\text{C}_{14}\text{mimBF}_4$  | 366.29 | White solid<br>88% | 39 | 0.85 (t, 3H), 1.23 (m, 22H), 1.76 (m, 2H), 3.84 (s, 3H), 4.14 (t, 2H), 7.69 (s, 1H), 7.76 (s, 1H), 9.09 (s, 1H).                                                                                                                                                                                                                                                                                                                                                                                                                                                                                               |
| $\text{C}_{14}\text{mimDMSIP}$ | 552.72 | White solid<br>85% | -  | 0.85 (t, 3H), 1.23 (m, 22H), 1.76 (m, 2H), 3.84 (s, 3H), 4.14 (t, 2H), 7.70 (s, 1H), 7.76 (s, 1H), 9.10 (s, 1H).                                                                                                                                                                                                                                                                                                                                                                                                                                                                                               |

|                                    |        |                           |    |                                                                                                                                                                                                                                                                                                                                                                                                                         |
|------------------------------------|--------|---------------------------|----|-------------------------------------------------------------------------------------------------------------------------------------------------------------------------------------------------------------------------------------------------------------------------------------------------------------------------------------------------------------------------------------------------------------------------|
|                                    |        |                           |    | Signals of the benzene ring in 1,3-dimethyl-5-sulfoisophthalate anion: 3.91 (s, 6H, CH <sub>3</sub> -O), 8.39 (d, 2H, CH in ortho position with respect to SO <sub>3</sub> <sup>-</sup> substituents), 8.42 (d, 1H, CH in para position with respect to SO <sub>3</sub> <sup>-</sup> substituents).                                                                                                                     |
| C <sub>16</sub> mimBF <sub>4</sub> | 394.34 | White solid<br>80%        | 50 | 0.85 (t, 3H), 1.23 (m, 26H), 1.76 (m, 2H), 3.84 (s, 3H), 4.14 (t, 2H), 7.69 (s, 1H), 7.76 (s, 1H), 9.08 (s, 1H).                                                                                                                                                                                                                                                                                                        |
| C <sub>16</sub> mimDMSIP           | 580.78 | White solid<br>93%        | 49 | 0.85 (t, 3H), 1.23 (m, 26H), 1.76 (m, 2H), 3.84 (s, 3H), 4.14 (t, 2H), 7.70 (s, 1H), 7.77 (s, 1H), 9.10 (s, 1H).<br>Signals of the benzene ring in 1,3-dimethyl-5-sulfoisophthalate anion: 3.91 (s, 6H, CH <sub>3</sub> -O), 8.39 (d, 2H, CH in ortho position with respect to SO <sub>3</sub> <sup>-</sup> substituents), 8.42 (d, 1H, CH in para position with respect to SO <sub>3</sub> <sup>-</sup> substituents). |
| C <sub>18</sub> mimBF <sub>4</sub> | 422.40 | Light-yellow solid<br>85% | 59 | 0.85 (t, 3H), 1.23 (m, 30H), 1.76 (m, 2H), 3.84 (s, 3H), 4.14 (t, 2H), 7.69 (s, 1H), 7.76 (s, 1H), 9.09 (s, 1H).                                                                                                                                                                                                                                                                                                        |
| C <sub>18</sub> mimDMSIP           | 608.83 | Light-yellow solid<br>82% | 62 | 0.84 (t, 3H), 1.22 (m, 30H), 1.75 (m, 2H), 3.84 (s, 3H), 4.13 (t, 2H), 7.70 (s, 1H), 7.76 (s, 1H), 9.11 (s, 1H).<br>Signals of the benzene ring in 1,3-dimethyl-5-sulfoisophthalate anion: 3.90 (s, 6H, CH <sub>3</sub> -O), 8.39 (d, 2H, CH in ortho position with respect to SO <sub>3</sub> <sup>-</sup> substituents), 8.42 (d, 1H, CH in para position with respect to SO <sub>3</sub> <sup>-</sup> substituents). |



|                                    |        |                                 |    |                                                                                                                                                                                                                                                                                                                                                                                                                                           |
|------------------------------------|--------|---------------------------------|----|-------------------------------------------------------------------------------------------------------------------------------------------------------------------------------------------------------------------------------------------------------------------------------------------------------------------------------------------------------------------------------------------------------------------------------------------|
| C <sub>20</sub> mimBF <sub>4</sub> | 450.45 | Pale-yellow<br>solid<br><br>84% | 70 | 0.85 (t, 3H), 1.23 (m, 34H), 1.76 (m, 2H),<br>3.84 (s, 3H), 4.14 (t, 2H), 7.69 (s, 1H), 7.76<br>(s, 1H), 9.09 (s, 1H).                                                                                                                                                                                                                                                                                                                    |
| C <sub>20</sub> mimDMSIP           | 636.88 | Pale-yellow<br>solid<br><br>82% | 70 | 0.85 (t, 3H), 1.22 (m, 34H), 1.76 (m, 2H),<br>3.84 (s, 3H), 4.14 (t, 2H), 7.69 (s, 1H), 7.76<br>(s, 1H), 9.09 (s, 1H). Signals of the benzene<br>ring in 1,3-dimethyl-5-sulfoisophthalate<br>anion: 3.91 (s, 6H, CH <sub>3</sub> -O), 8.39 (d, 2H, CH<br>in ortho position with respect to SO <sub>3</sub> <sup>-</sup><br>substituents), 8.42 (d, 1H, CH in para<br>position with respect to SO <sub>3</sub> <sup>-</sup> substituents). |

**Table S2.** Formulas, calculated and measured  $m/z$  values of the peaks assigned to cations and adducts of ILs by MALDI TOF analysis. The adducts are constituted by two cations and the anion.

| Cations                                                          |                         |                           | IL Adducts (BF <sub>4</sub> )                                               |                         |                           | IL Adducts (DMSIP)                                                            |                         |                           |
|------------------------------------------------------------------|-------------------------|---------------------------|-----------------------------------------------------------------------------|-------------------------|---------------------------|-------------------------------------------------------------------------------|-------------------------|---------------------------|
| <i>Formulas</i>                                                  | <i>Measured<br/>m/z</i> | <i>Calculated<br/>m/z</i> | <i>Formulas</i>                                                             | <i>Measured<br/>m/z</i> | <i>Calculated<br/>m/z</i> | <i>Formulas</i>                                                               | <i>Measured<br/>m/z</i> | <i>Calculated<br/>m/z</i> |
| <b>1-methyl-3-nonylimidazole<br/>[C9mim]<sup>+</sup></b>         |                         |                           | <b>[(C9mim)<sub>2</sub>]<sup>+</sup> BF<sub>4</sub><sup>−</sup></b>         |                         |                           | <b>[(C9mim)<sub>2</sub>]<sup>+</sup> DMSIP<sup>−</sup></b>                    |                         |                           |
| C <sub>13</sub> H <sub>25</sub> N <sub>2</sub> <sup>+</sup>      | 209.19                  | 209.20                    | C <sub>26</sub> H <sub>50</sub> N <sub>4</sub> BF <sub>4</sub> <sup>+</sup> | 505.49                  | 505.41                    | C <sub>36</sub> H <sub>59</sub> N <sub>4</sub> O <sub>7</sub> S <sup>+</sup>  | 691.56                  | 691.41                    |
| <b>1-decyl-3-methylimidazole<br/>[C10mim]<sup>+</sup></b>        |                         |                           | <b>[(C10mim)<sub>2</sub>]<sup>+</sup> BF<sub>4</sub><sup>−</sup></b>        |                         |                           | <b>[(C10mim)<sub>2</sub>]<sup>+</sup> DMSIP<sup>−</sup></b>                   |                         |                           |
| C <sub>14</sub> H <sub>27</sub> N <sub>2</sub> <sup>+</sup>      | 223.20                  | 223.22                    | C <sub>28</sub> H <sub>54</sub> N <sub>4</sub> BF <sub>4</sub> <sup>+</sup> | 533.53                  | 533.44                    | C <sub>38</sub> H <sub>63</sub> N <sub>4</sub> O <sub>7</sub> S <sup>+</sup>  | 719.59                  | 719.44                    |
| <b>1-dodecyl-3-methylimidazole<br/>[C12mim]<sup>+</sup></b>      |                         |                           | <b>[(C12mim)<sub>2</sub>]<sup>+</sup> BF<sub>4</sub><sup>−</sup></b>        |                         |                           | <b>[(C12mim)<sub>2</sub>]<sup>+</sup> DMSIP<sup>−</sup></b>                   |                         |                           |
| C <sub>16</sub> H <sub>31</sub> N <sub>2</sub> <sup>+</sup>      | 251.28                  | 251.25                    | C <sub>32</sub> H <sub>62</sub> N <sub>4</sub> BF <sub>4</sub> <sup>+</sup> | 589.59                  | 589.50                    | C <sub>42</sub> H <sub>71</sub> N <sub>4</sub> O <sub>7</sub> S <sup>+</sup>  | 775.63                  | 775.50                    |
| <b>1-methyl-3-tetradecylimidazolium<br/>[C14mim]<sup>+</sup></b> |                         |                           | <b>[(C14mim)<sub>2</sub>]<sup>+</sup> BF<sub>4</sub><sup>−</sup></b>        |                         |                           | <b>[(C14mim)<sub>2</sub>]<sup>+</sup> DMSIP<sup>−</sup></b>                   |                         |                           |
| C <sub>18</sub> H <sub>35</sub> N <sub>2</sub> <sup>+</sup>      | 279.25                  | 279.28                    | C <sub>36</sub> H <sub>70</sub> N <sub>4</sub> BF <sub>4</sub> <sup>+</sup> | 645.55                  | 645.56                    | C <sub>46</sub> H <sub>79</sub> N <sub>4</sub> O <sub>7</sub> S <sup>+</sup>  | 832.56                  | 832.57                    |
| <b>1-hexadecyl-3-methylimidazolium<br/>[C16mim]<sup>+</sup></b>  |                         |                           | <b>[(C16mim)<sub>2</sub>]<sup>+</sup> BF<sub>4</sub><sup>−</sup></b>        |                         |                           | <b>[(C16mim)<sub>2</sub>]<sup>+</sup> DMSIP<sup>−</sup></b>                   |                         |                           |
| C <sub>20</sub> H <sub>39</sub> N <sub>2</sub> <sup>+</sup>      | 307.34                  | 307.31                    | C <sub>40</sub> H <sub>78</sub> N <sub>4</sub> BF <sub>4</sub> <sup>+</sup> | 701.82                  | 701.63                    | C <sub>50</sub> H <sub>87</sub> N <sub>4</sub> O <sub>7</sub> S <sup>+</sup>  | 887.77                  | 887.63                    |
| <b>1-methyl-3-octadecylimidazolium<br/>[C18mim]<sup>+</sup></b>  |                         |                           | <b>[(C18mim)<sub>2</sub>]<sup>+</sup> BF<sub>4</sub><sup>−</sup></b>        |                         |                           | <b>[(C18mim)<sub>2</sub>]<sup>+</sup> DMSIP<sup>−</sup></b>                   |                         |                           |
| C <sub>22</sub> H <sub>43</sub> N <sub>2</sub> <sup>+</sup>      | 335.35                  | 335.59                    | C <sub>44</sub> H <sub>86</sub> N <sub>4</sub> BF <sub>4</sub> <sup>+</sup> | 757.65                  | 757.69                    | C <sub>54</sub> H <sub>95</sub> N <sub>4</sub> O <sub>7</sub> S <sup>+</sup>  | 757.65                  | 757.69                    |
| <b>1-eicosyl-3-methylimidazolium<br/>[C20mim]<sup>+</sup></b>    |                         |                           | <b>[(C20mim)<sub>2</sub>]<sup>+</sup> BF<sub>4</sub><sup>−</sup></b>        |                         |                           | <b>[(C20mim)<sub>2</sub>]<sup>+</sup> DMSIP<sup>−</sup></b>                   |                         |                           |
| C <sub>24</sub> H <sub>47</sub> N <sub>2</sub> <sup>+</sup>      | 363.27                  | 363.64                    | C <sub>48</sub> H <sub>94</sub> N <sub>4</sub> BF <sub>4</sub> <sup>+</sup> | 813.68                  | 813.75                    | C <sub>58</sub> H <sub>103</sub> N <sub>4</sub> O <sub>7</sub> S <sup>+</sup> | 999.69                  | 999.75                    |

**Table S3.** IL release (%) from the PVC blends loaded with the PVC/*C<sub>n</sub>*mimBF<sub>4</sub> and PVC/*C<sub>n</sub>*mimDMSIP blends, at different concentrations (0.5, 1, 5%). The release (%) values are calculated from the amounts of ILs released after 24 h.

| Samples                   | IL content |      |      |
|---------------------------|------------|------|------|
|                           | 0.5%       | 1%   | 5%   |
| PVC/C12mimBF <sub>4</sub> | 5.9        | 5.1  | 2.6  |
| PVC/C14mimBF <sub>4</sub> | 23.8       | 24.2 | 30.4 |
| PVC/C16mimBF <sub>4</sub> | 18.5       | 28.2 | 29.6 |
| PVC/C12mimDMSIP           | 4.2        | 3.2  | 1.8  |
| PVC/C14mimDMSIP           | 6.3        | 6.7  | 6.9  |
| PVC/C16mimDMSIP           | 6.5        | 9.7  | 16.3 |

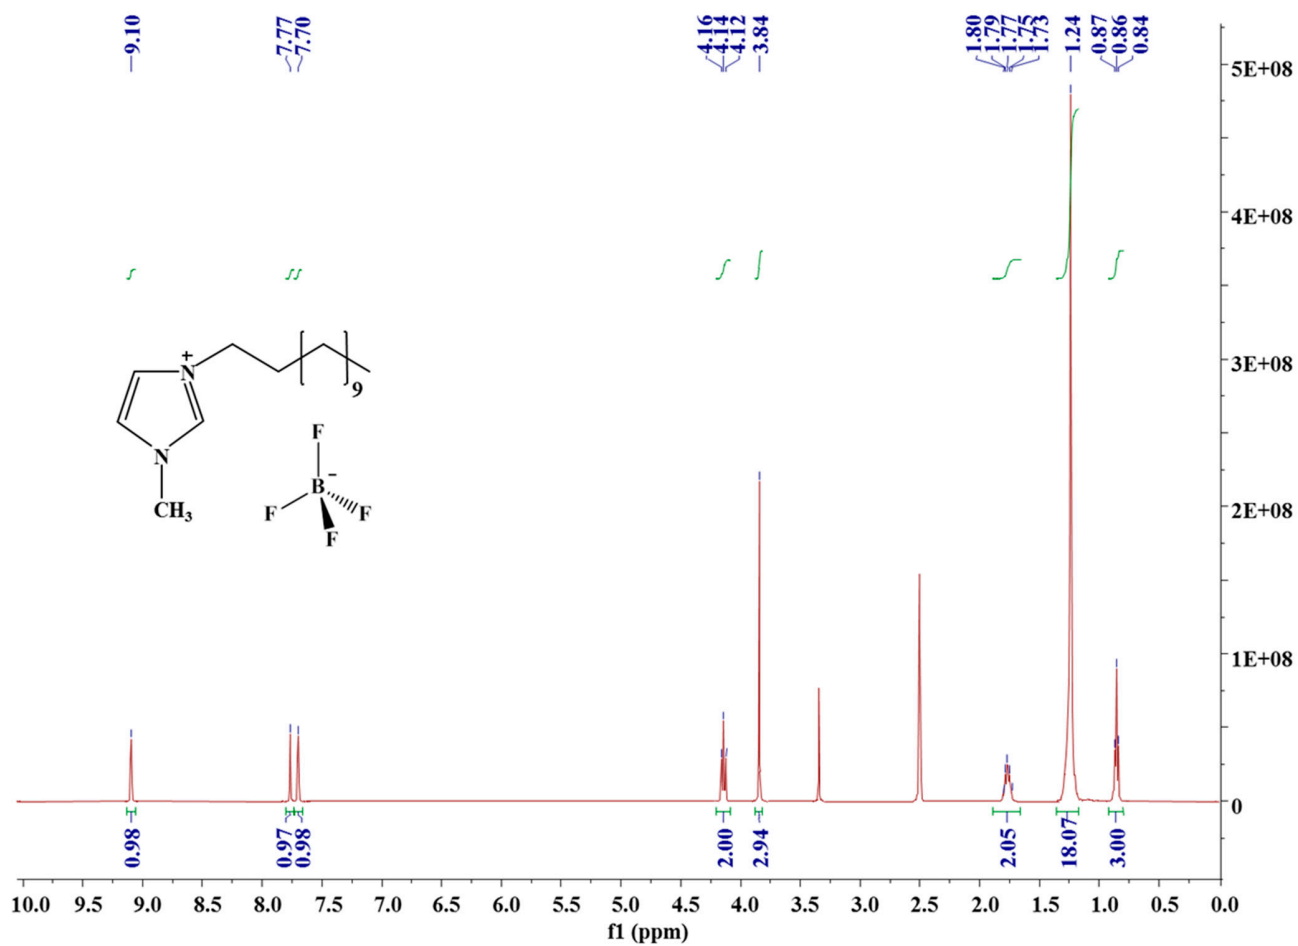

**Figure S1.**  $^1\text{H}$ -NMR spectrum (400 MHz,  $\text{DMSO-d}_6$ ,  $\delta$  ppm) of the IL 1-dodecyl-3-methylimidazolium tetrafluoroborate ( $\text{C}_{12}\text{mimBF}_4$ )

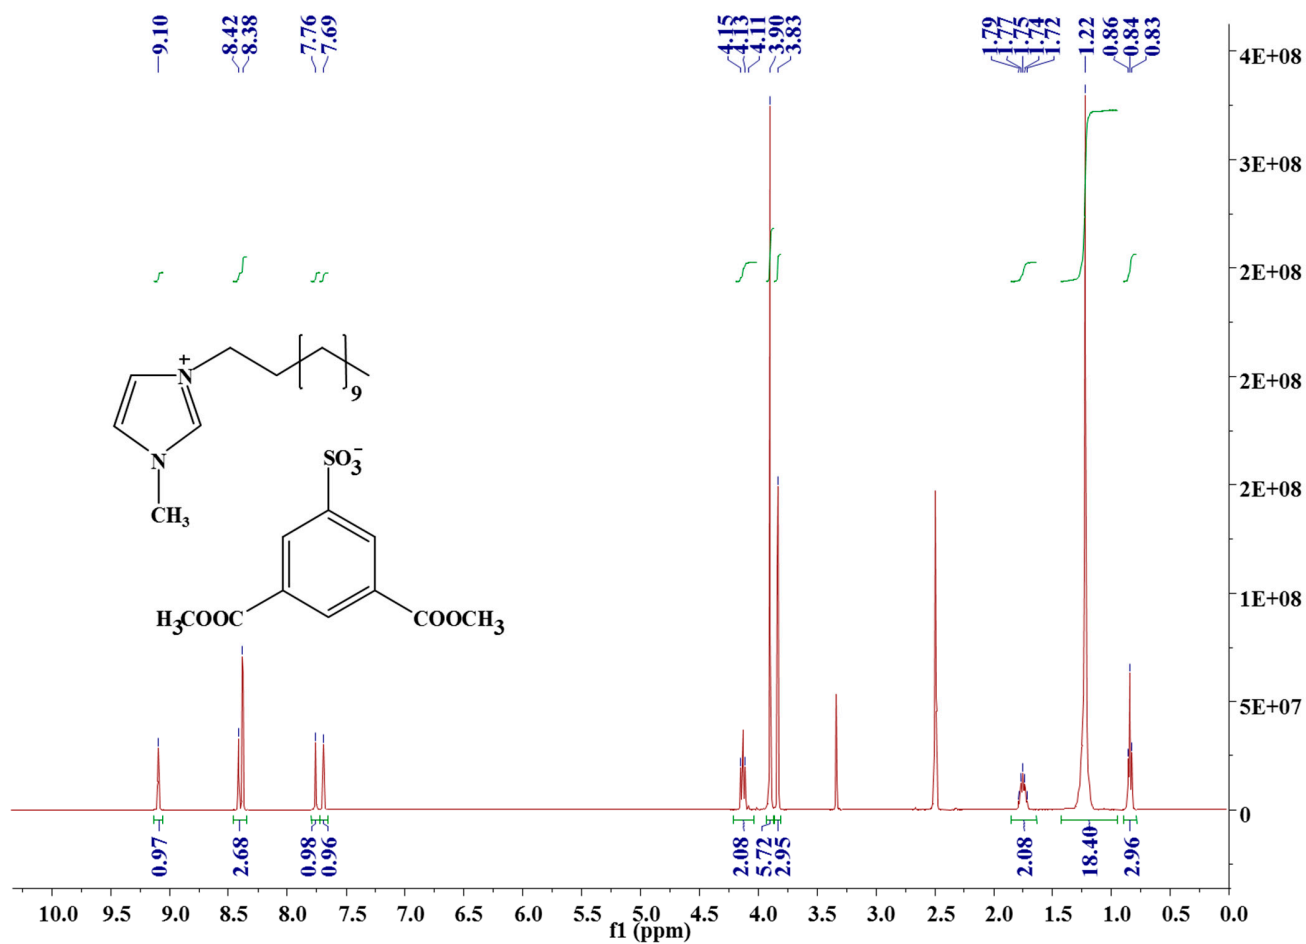

**Figure S2.** <sup>1</sup>H-NMR spectrum (400 MHz, DMSO-d<sub>6</sub>, δ ppm) of the IL 1-dodecyl-3-methylimidazolium 1,3-dimethyl-5-sulfoisophthalate (C12mimDMSIP)

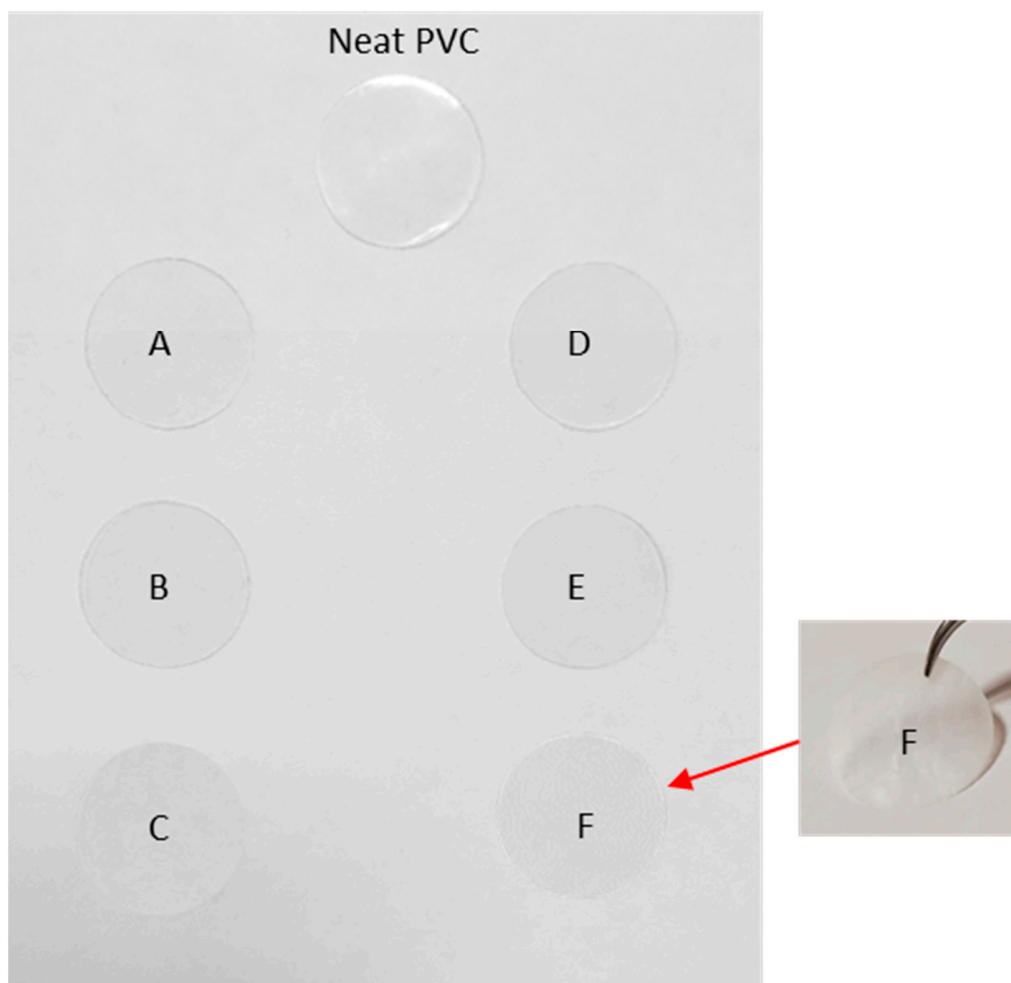

**Figure S3.** Image of neat PVC and PVC blend films loaded with 5 wt% concentration of C12mimDMSIP (A), C14mimDMSIP (B), C16mimDMSIP (C) and C12mimBF<sub>4</sub> (D), C14mimBF<sub>4</sub> (E), C16mimBF<sub>4</sub> (F). The PVC/5%C16mimBF<sub>4</sub> blend film was slightly whitish and opaque (F)

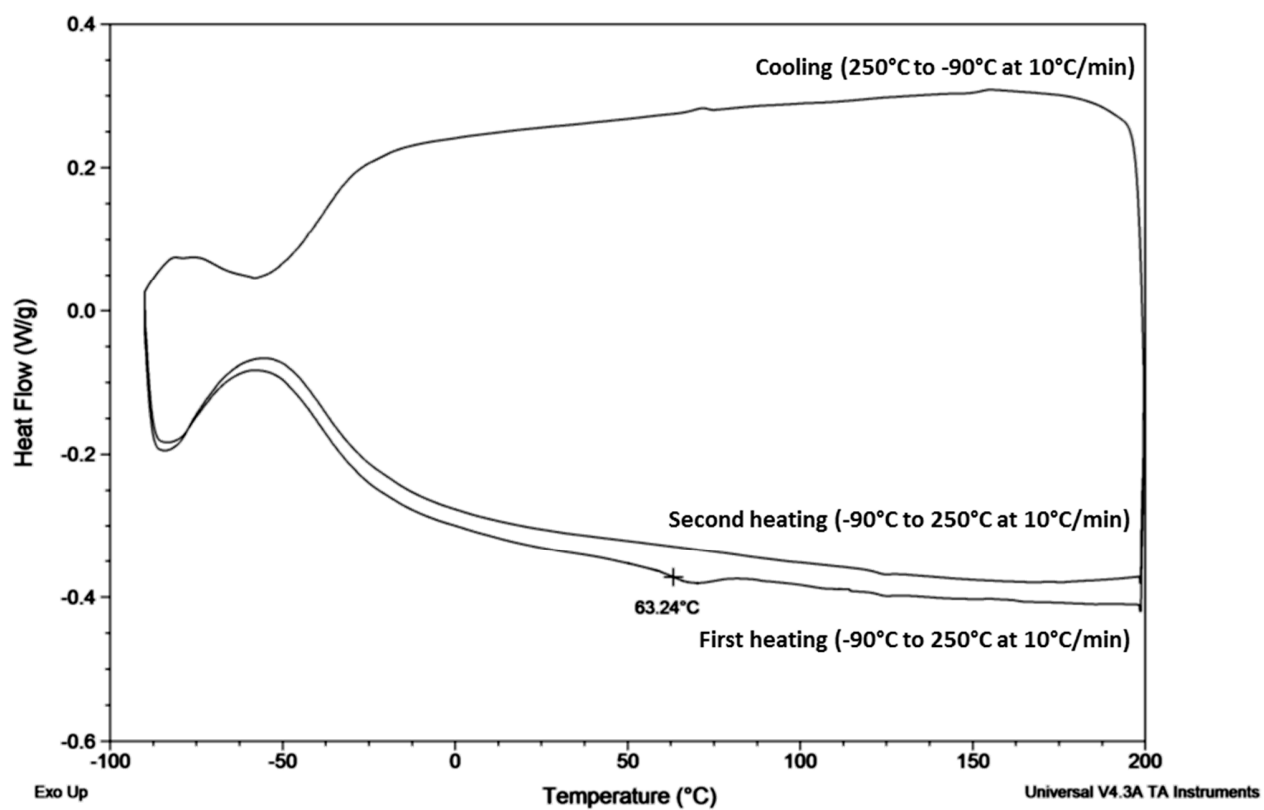

**Figure S4.** DSC curves of neat PVC TOTM.

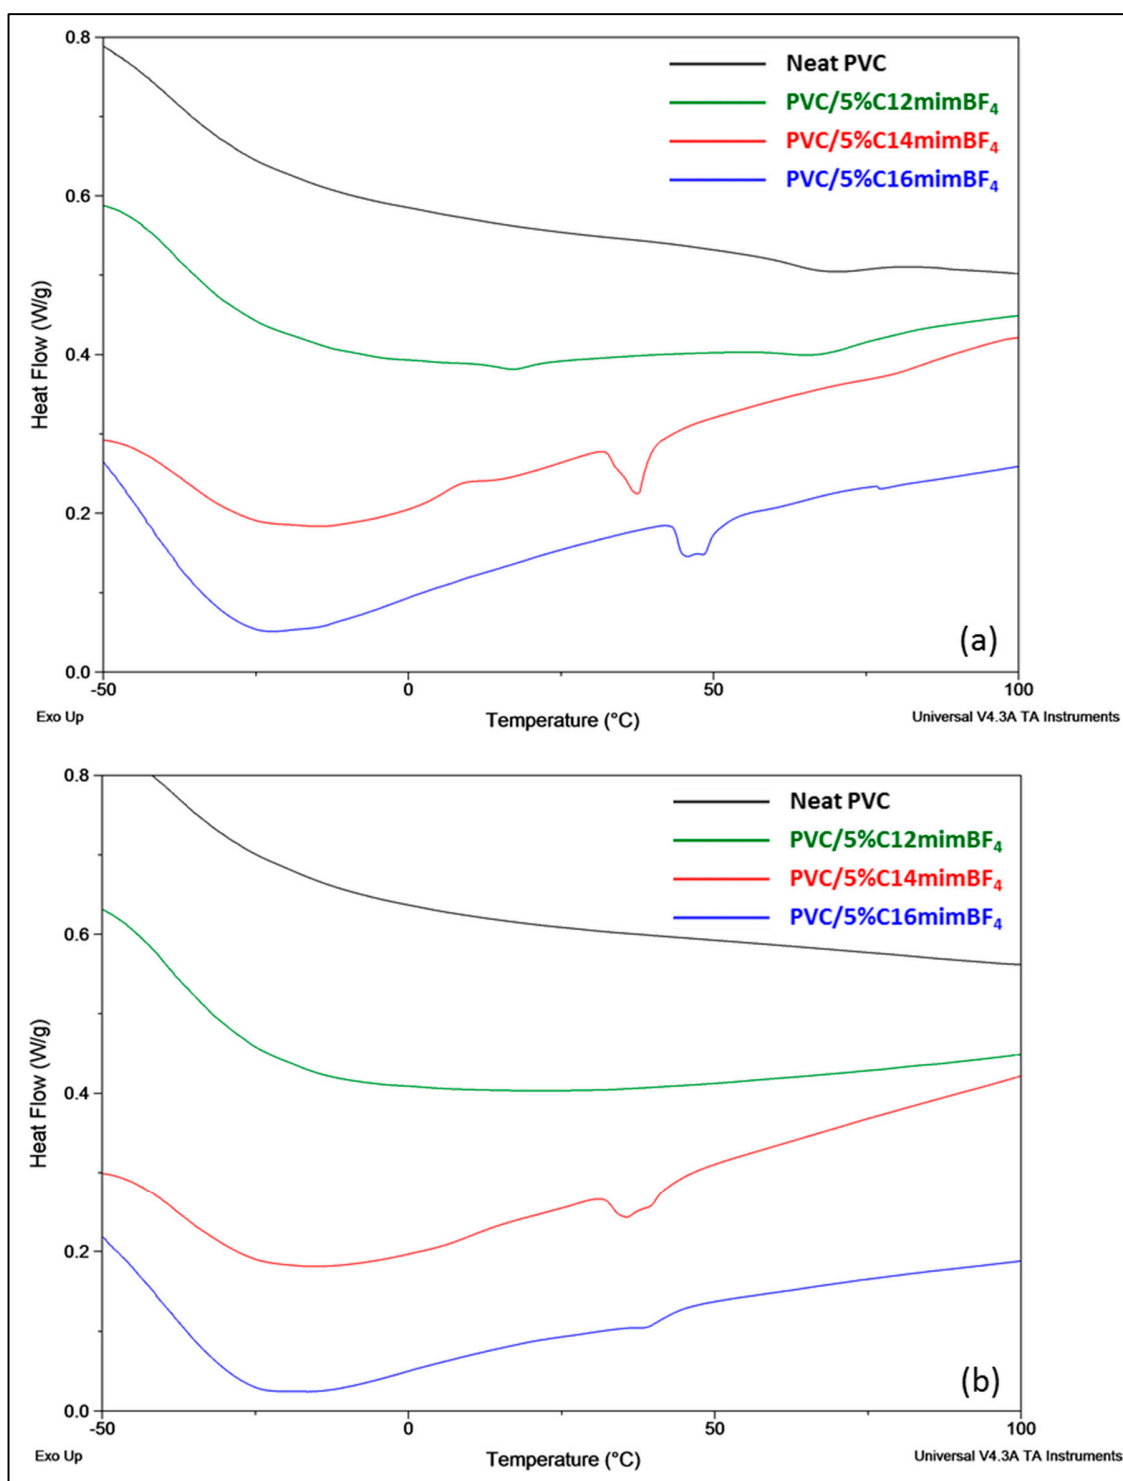

**Figure S5.** DSC curves of neat PVC TOTM and PVC/ $C_n\text{mimBF}_4$  blend films (n = 12, 14, 16). (a) First heating, (b) second heating. Curves are displaced for clarity.



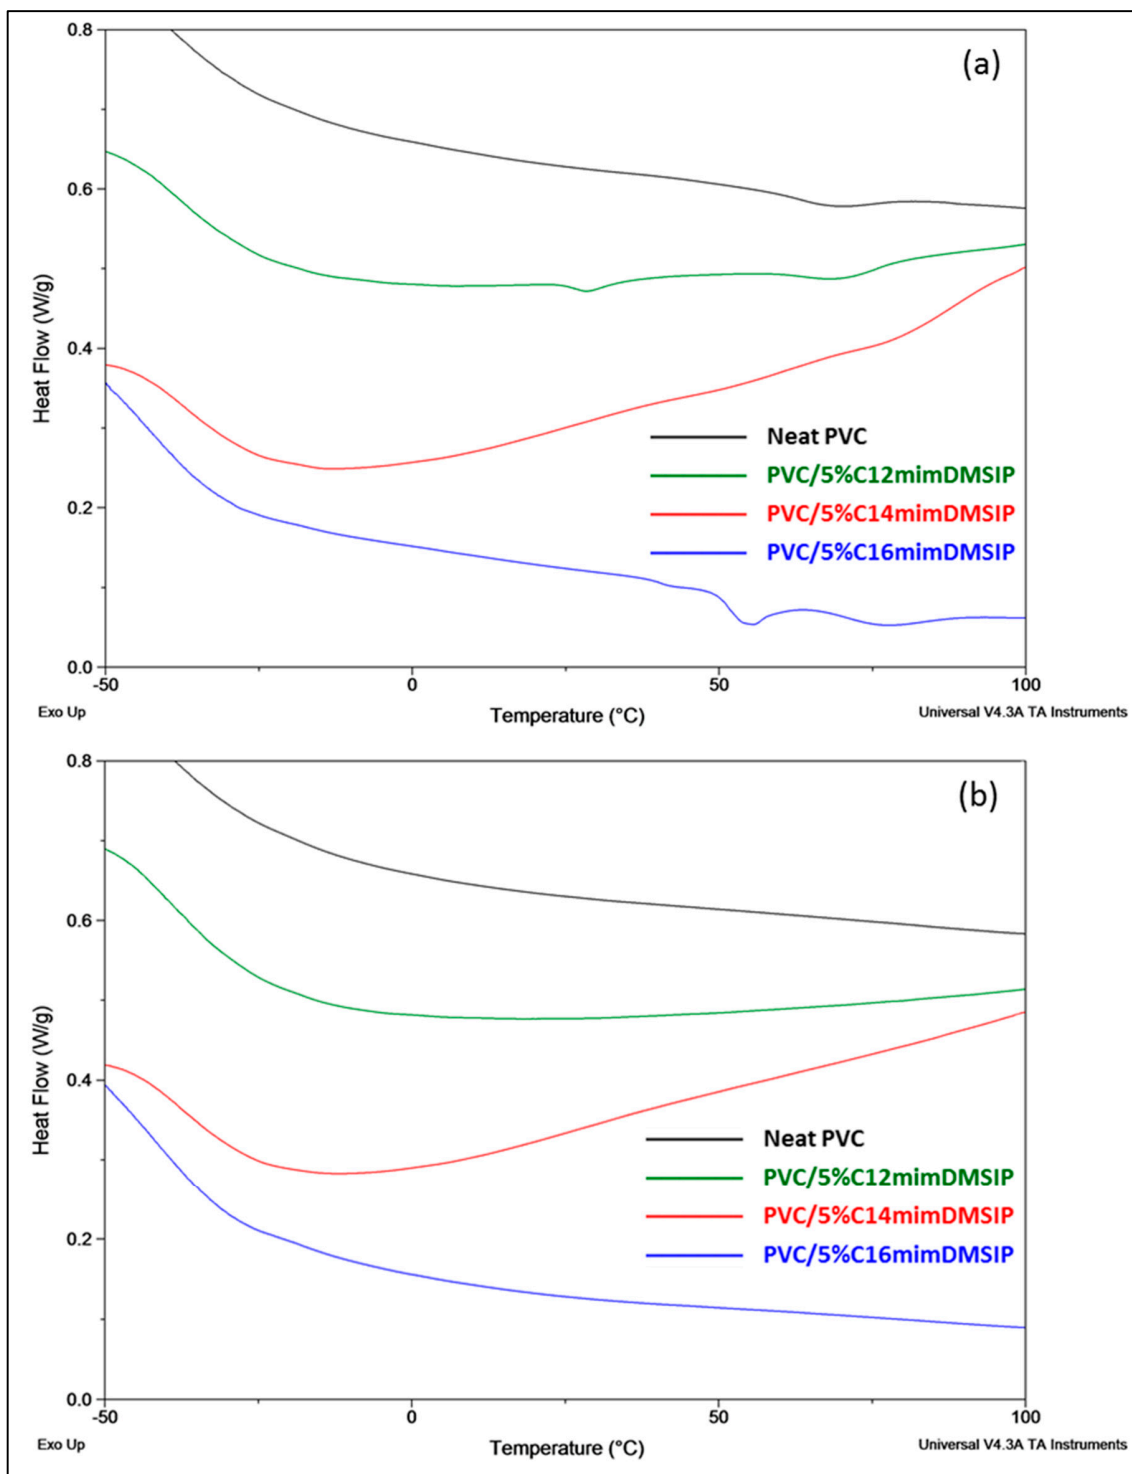

**Figure S6.** DSC curves of neat PVC TOTM and PVC/C<sub>n</sub>mimDMSIP blend films (n = 12, 14, 16). (a) First heating, (b) second heating. Curves are displaced for clarity.

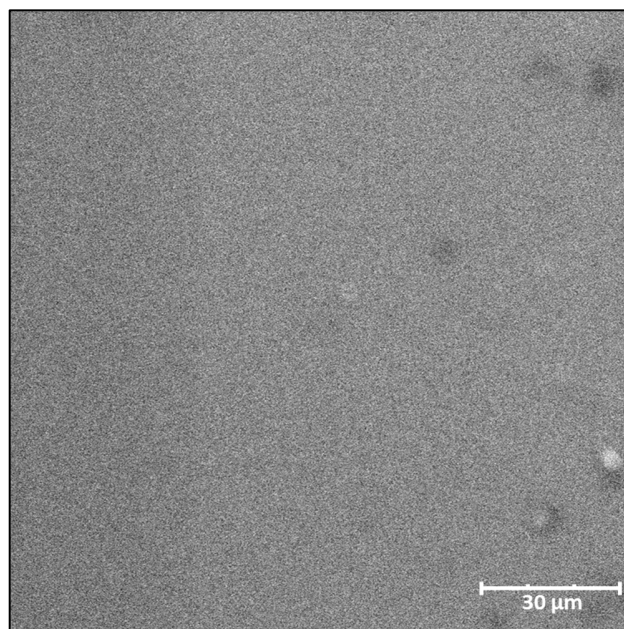

**Figure S7.** SEM picture (magnification 2000×) of neat PVC

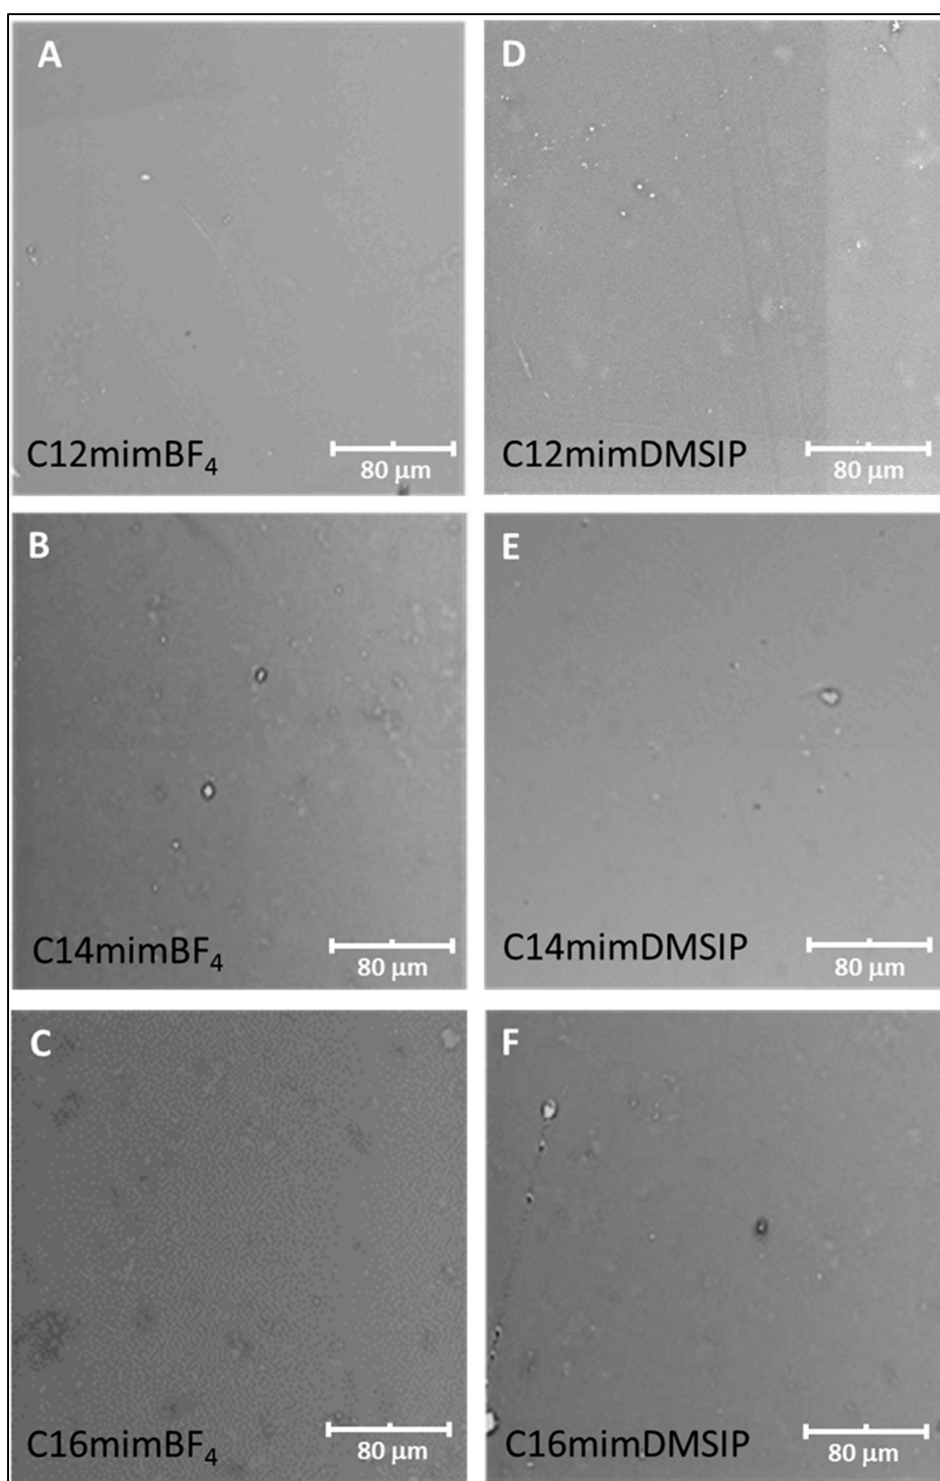

**Figure S8.** SEM pictures (magnification 1000×) of PVC blend films containing the 0.5 wt% concentration of (A) C12mimBF<sub>4</sub>, (B) C14mimBF<sub>4</sub>, (C) C16mimBF<sub>4</sub>, (D) C12mimDMSIP, (E) C14mimDMSIP, (F) C16mimDMSIP.

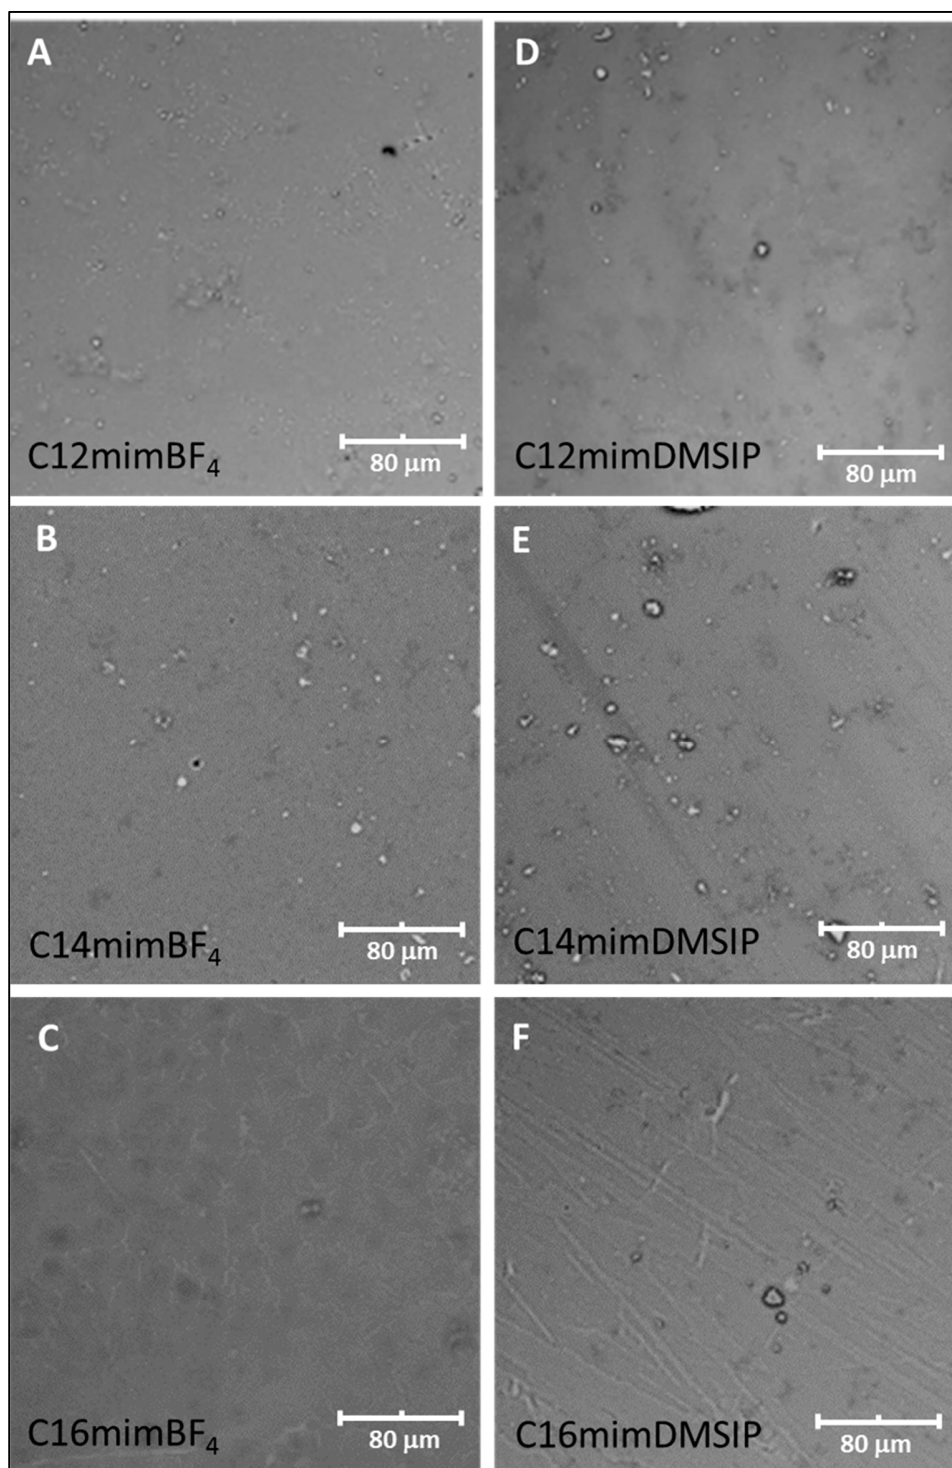

**Figure S9.** SEM pictures (magnification 1000×) of PVC blend films containing the 1 wt% concentration of (A) C12mimBF<sub>4</sub>, (B) C14mimBF<sub>4</sub>, (C) C16mimBF<sub>4</sub>, (D) C12mimDMSIP, (E) C14mimDMSIP, (F) C16mimDMSIP.

## Bibliography

- [1] Holbrey, J. D.; Reichert, W. M.; Swatloski, R. P.; Broker, G. A.; Pitner, W. R.; Seddon, K. R.; Rogers, R. D. Efficient, halide free synthesis of new, low cost ionic liquids: 1, 3-dialkylimidazolium salts containing methyl-and ethyl-sulfate anions. *Green Chem.* **2002**, 4(5), 407-413. <https://doi.org/10.1039/B204469B>.
- [2] Colonna, M.; Berti, C.; Binassi, E.; Fiorini, M.; Sullalti, S.; Acquasanta, F.; Vannini, M.; Di Gioia, D.; Aloisio, I. Imidazolium poly(butylene terephthalate) ionomers with long-term antimicrobial activity. *Polymer* **2012**, 53, 1823–1830. <https://doi.org/10.1016/j.polymer.2012.03.003>.
- [3] Bakulina, O. D.; Ivanov, M. Y.; Prikhod'ko, S. A.; Pylaeva, S.; Zaytseva, I. V.; Surovtsev, N. V.; Adonin, N.Y.; Fedin, M. V. Nanocage formation and structural anomalies in imidazolium ionic liquid glasses governed by alkyl chains of cations. *Nanoscale* **2020**, 12 (38), 19982-19991. <https://doi.org/10.1039/D0NR06065H>.
